# Supplementary material for: Structural and optical characterisation of silanised Dy-doped-Gd2O3 NPs
Source: Royal Society of Chemistry journal article supplement (doi:10.1039/d3cp00618b), 2023-01-01
Supplement: d3cp00618b1.pdf [file d3cp00618b1.pdf]

## Supplementary Material

### Attenuated Total reflectance Infrared Spectra

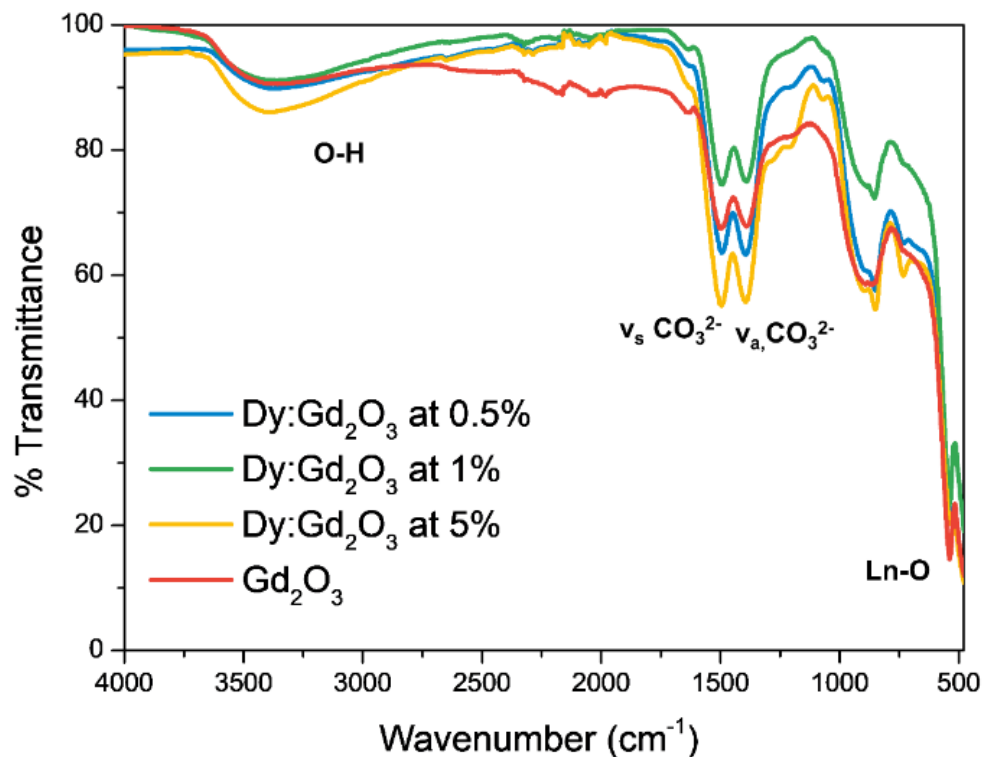

**S1.** Infrared spectra for the gadolinium oxide (matrix) and its Dy<sup>3+</sup>-doped oxides. All of them show the hydrated molecules and carbonate ions on their surfaces.

### Thermogravimetric analysis

The thermal stability of the Dy: Gd<sub>2</sub>O<sub>3</sub> at 1% sample was studied from 25 to 1000 °C at a heating rate of 10 °C / min. The following slopes were observed corresponding to a total loss of 5% w: The first slope, which goes up to 180 °C was assigned to adsorbed water molecules losses (1.4%) on the oxide surface. The second (2.5% w) up to 418 °C and the third losses (0.6%) at 646 °C, are attributed to the hydroxide formation and its subsequent hydrolysis during the sol-gel process. The above indicates a remnant of hydroxide precursor due to a low calcination time. Finally, the

fourth loss is related to the formation of  $\text{CO}_3^{2-}$  ions on the oxide surface owing to the presence of atmospheric  $\text{CO}_2$  during the calcination process. However, these ions are found at a trace level (0.7% in weight) making them difficult to observe by XRD measurements.

The amount of remanent  $\text{OH}^-$ , particularly on the oxide surfaces, enhanced their silanisation process and the subsequent biomolecules binding. Previous work has also reported successful silanisation without previous surface activation, where the protein union occurs through Van der Waals interactions.

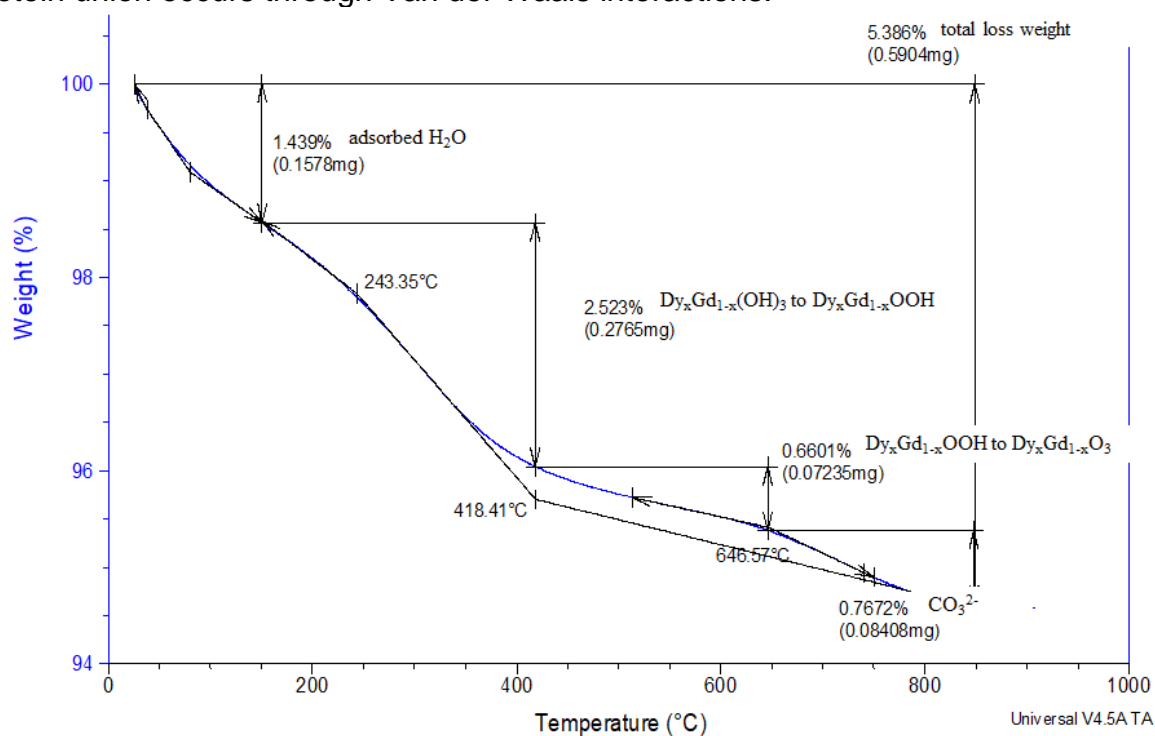

**S2.** Thermogram for sample  $\text{Dy@Gd}_2\text{O}_3$  (at 5%)

## Energy Dispersive Spectroscopy

| Element | Line Type | k Factor | k Factor type | Absorption Correction | Wt%    | Wt% Sigma | Atomic % |
|---------|-----------|----------|---------------|-----------------------|--------|-----------|----------|
| O       | K series  | 2.020    | Theoretical   | 1.00                  | 23.58  | 2.66      | 75.22    |
| Gd      | L series  | 2.111    | Theoretical   | 1.00                  | 73.07  | 3.21      | 23.72    |
| Dy      | L series  | 2.121    | Theoretical   | 1.00                  | 3.35   | 2.48      | 1.05     |
| Total   |           |          |               |                       | 100.00 |           | 100.00   |

**S3.** Atomic Composition chart for sample Dy: Gd<sub>2</sub>O<sub>3</sub> (at 1%).

## Photoluminescence in aqueous dispersion

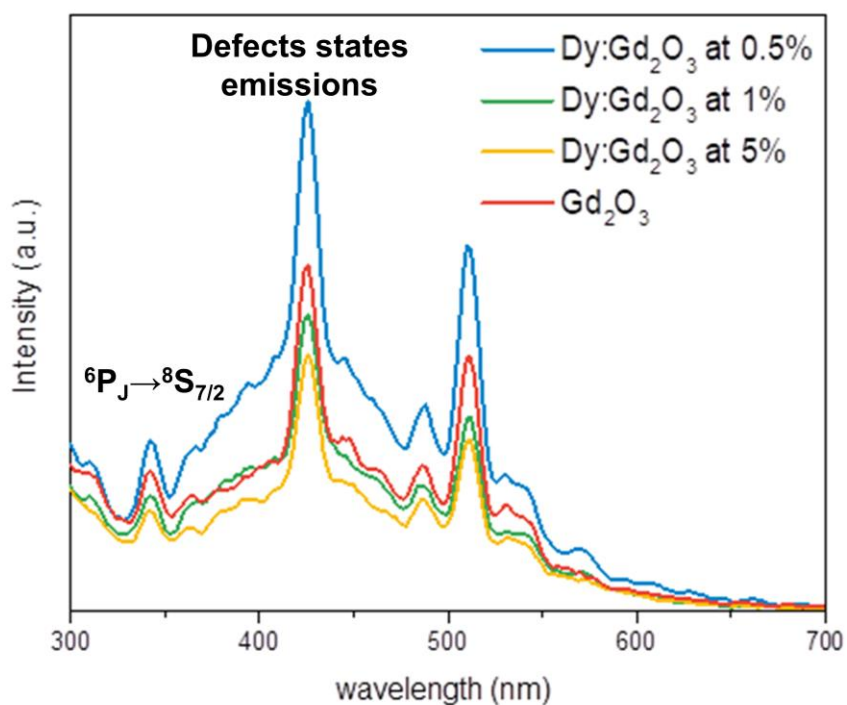

**S4.** Photoluminescence measurements exciting at 340 nm for Dy-doped Gd<sub>2</sub>O<sub>3</sub> nanoparticles dispersed in water.

## Magnetisation measurements

To know if there is a new magnetic ordering upon decreasing particle size, we measured the magnetisation behaviour of the Dy@Gd<sub>2</sub>O<sub>3</sub> (5%) and parent Gd<sub>2</sub>O<sub>3</sub> samples by registering the hysteresis loops at 300 K. Results from these measurements are presented in **S 5a** and show a clear paramagnetic response in both samples. Furthermore, 1 T field cooled (FC) temperature dependent

magnetisation measurements confirmed that this paramagnetic behaviour extends down to low temperatures (see **S5 b**).

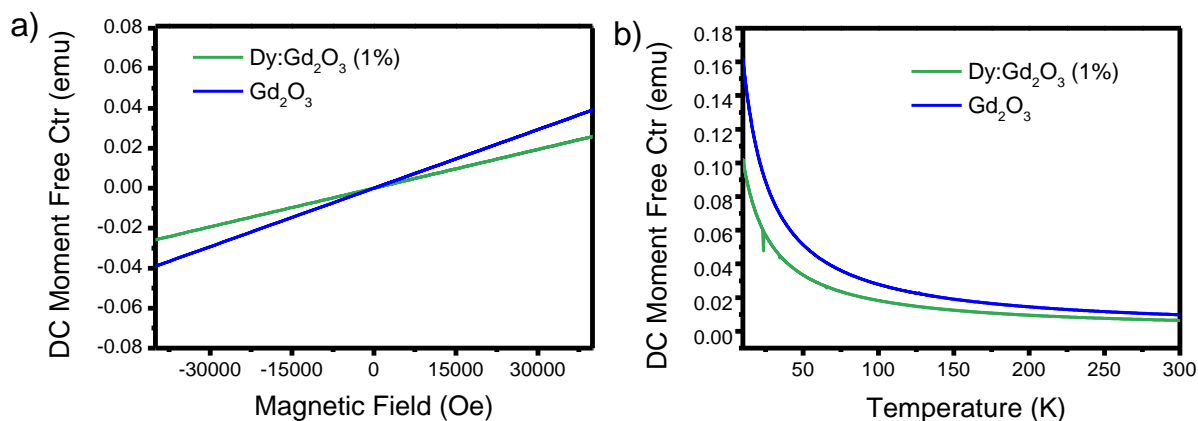

**S5.** Magnetisation measurements on Dy@Gd<sub>2</sub>O<sub>3</sub> (5%) (green line) and Gd<sub>2</sub>O<sub>3</sub> (blue line). a) Magnetic moment response vs external magnetic field (hysteresis loops) recorded at 300 K. b) 1T field cooled (FC) temperature dependent magnetization measurements (Is magnetic moment or susceptibility)

#### Computational details for XAS calculated spectra.

Atomic multiplet calculations for Gd<sup>3+</sup> and Dy<sup>3+</sup> at the M<sub>4,5</sub> edges (3d-4f transitions) were done using the code Crispy (Retegan, Marius. 2019. "Crispy: V0.7.3." <https://doi.org/10.5281/zenodo.1008184>) The calculations were done for T=300 K, the Hartree-Fock integrals F<sub>k</sub>, and G<sub>k</sub> were scaled to 80% (0.8) of its atomic values, while the spin-orbit coupling (z) was set to 100% (1). For Dy<sup>3+</sup> the values of the initial Hamiltonian were: U(4f,4f):0.0, F2(4f,4f):15.313, F4(4f,4f):9.609, F6(4f,4f):6.913, z (4f):0.246; On the other hand the values for the final Hamiltonian were: U(4f,4f):0, F2(4f,4f):15.967, F4(4f,4f):10.031, F6(4f,4f):7.221, U(3d,4f):0.0, F2(3d,4f):10.388, F4(3d,4f):4.881, G1(3d,4f):7.520, G3(3d,4f):4.411, G5(3d,4f):3.048, z (4f):0.278 y z (3d):14.441. To account for the natural broadening, the calculated spectra were broadened by Lorentzian functions with FWHM of 1.31 eV and 1.85 eV for the M<sub>4,5</sub>

edges, respectively. To improve the agreement with the experimental data, the calculated Dy<sup>3+</sup> spectra were also convoluted by 0.1 eV, 0.3 eV, 1.0 eV and 1.2 eV FWHM Gaussian Functions, representing the instrumental broadening. The best agreement between theory and experiment was found with the Gaussian set to 1.2 eV FWHM (see **S6 c**).

For Gd<sup>3+</sup> the values of the initial Hamiltonian were: U(4*f*,4*f*):0.0, F2(4*f*,4*f*):14.502, F4(4*f*,4*f*):9.101, F6(4*f*,4*f*):6.548, z (4*f*):0.197; On the other hand the values for the final Hamiltonian were: U(4*f*,4*f*):0, F2(4*f*,4*f*):15.195, F4(4*f*,4*f*):9.550, F6(4*f*,4*f*):6.875, U(3*d*,4*f*):0.0, F2(3*d*,4*f*):9.713, F4(3*d*,4*f*):4.532, G1(3*d*,4*f*):9.946, G3(3*d*,4*f*):4.072, G5(3*d*,4*f*):2.813, z (4*f*):0.226 y z (3*d*):12.358. The calculated spectra were broadened by Lorentzian functions with FWHM of 1.19 eV and 1.59 eV for the M<sub>4,5</sub> edges, respectively. To account for the instrumental broadening, the calculated Gd<sup>3+</sup> spectrum was also convoluted by 0.1 eV Gaussian (see **S6 b**).

Further, to compare experimental and theoretical spectra, after normalising to one the intensity of the peak at the M<sub>5</sub> edge, the calculated spectra of Dy<sup>3+</sup> and Gd<sup>3+</sup> were shifted by -8.141 eV and -16.495 eV, respectively.

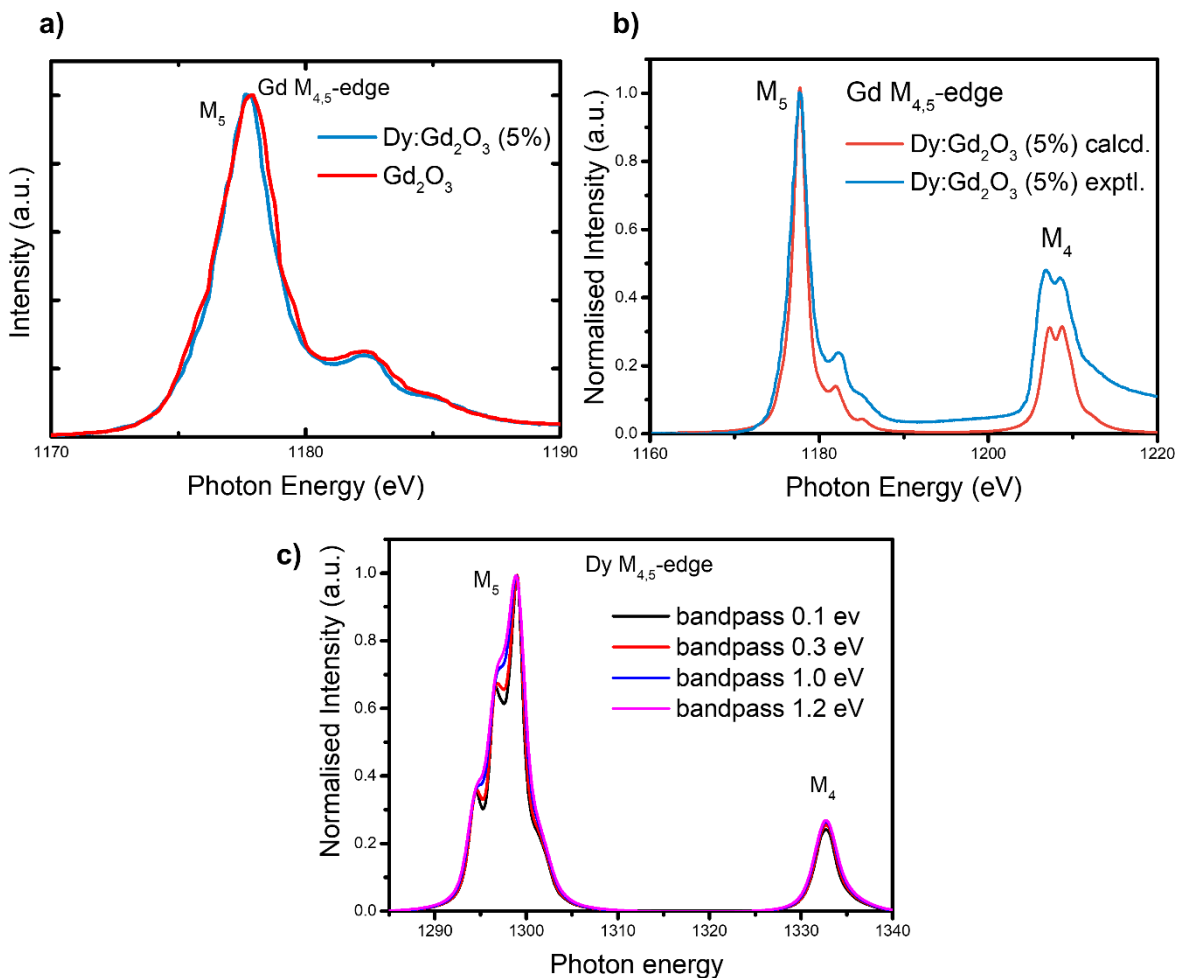

**S6.** Calculated atomic Gd<sup>3+</sup> and Dy<sup>3+</sup>  $M_{4,5}$ -edge spectra. **a)** Amplification of the absorption level  $M_5$  for the host matrix with (blue line) and without (red line) the dopant (Dy<sup>3+</sup>). **b)** Comparison between the calculated (red line) and experimental (blue line) XAS spectra monitoring the  $M_{4,5}$ -edge absorption in Gd<sup>3+</sup>. **c)** Calculated XAS spectra monitoring the Dy<sup>3+</sup>  $M_{4,5}$ -edges absorption convoluted by 0.1 eV, 0.3 eV, 1.0 eV and 1.2 eV FWHM Gaussian Functions. All calculated spectra were generated using the code Crispy (Retegan, Marius. 2019. "Crispy: V0.7.3." <https://doi.org/10.5281/zenodo.1008184>).
